# Supplementary material for: Single-cell transcriptomics of staged oocytes and somatic cells reveal novel regulators of follicle activation
Source: PubMed Central journal article supplement (PMC9354060; doi:10.1530/rep-22-0053), 2022-06-17

Oocytes

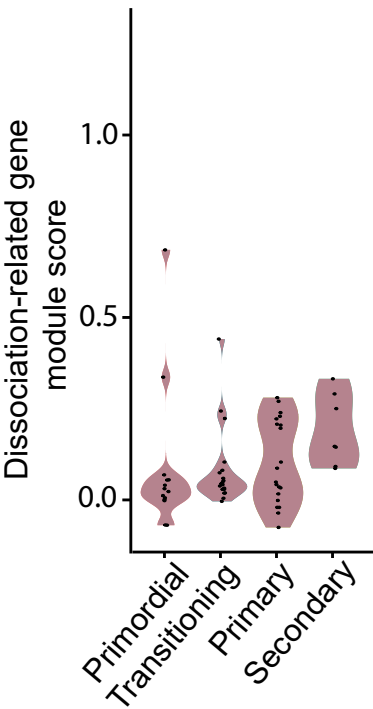

Somatic cells

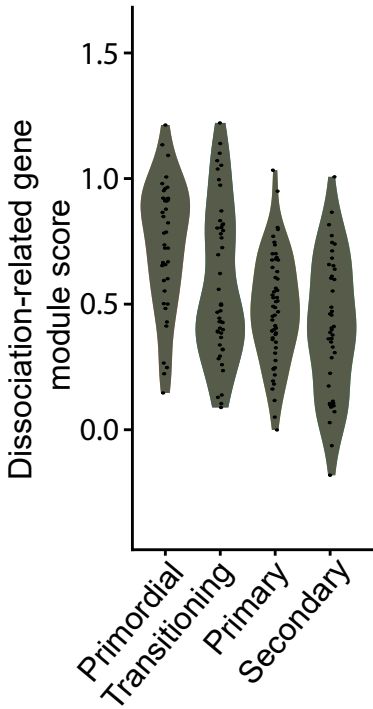

Supplement: supplementary_figure_7.pdf [file supplementary_figure_7.pdf]
