# Supplementary material for: Single-cell transcriptomics of staged oocytes and somatic cells reveal novel regulators of follicle activation
Source: PubMed Central journal article supplement (PMC9354060; doi:10.1530/rep-22-0053), 2022-06-17

## Oocyte module

## Somatic module

Before filtering

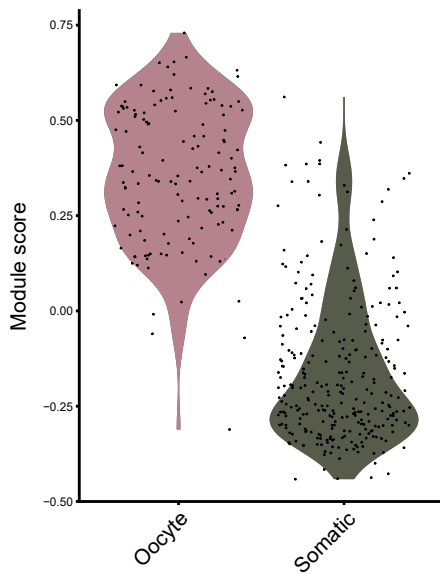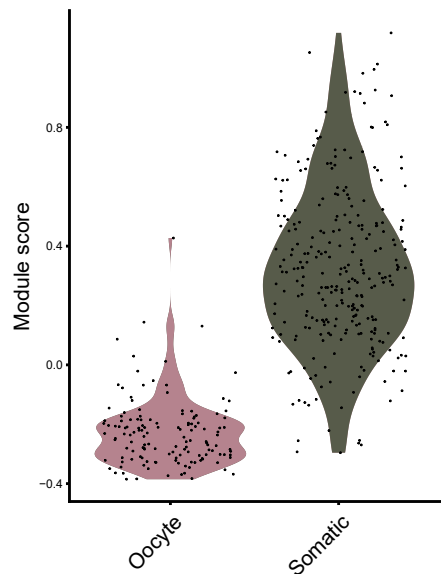

After filtering

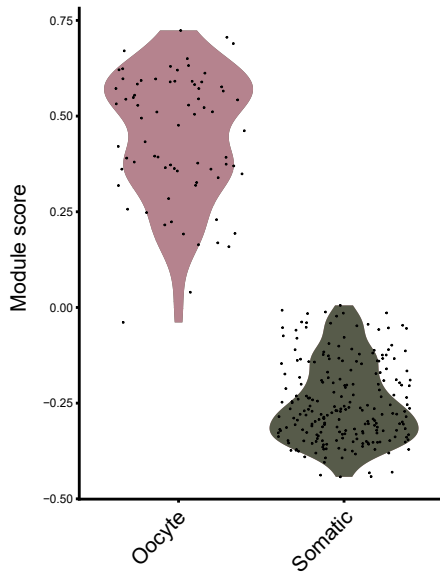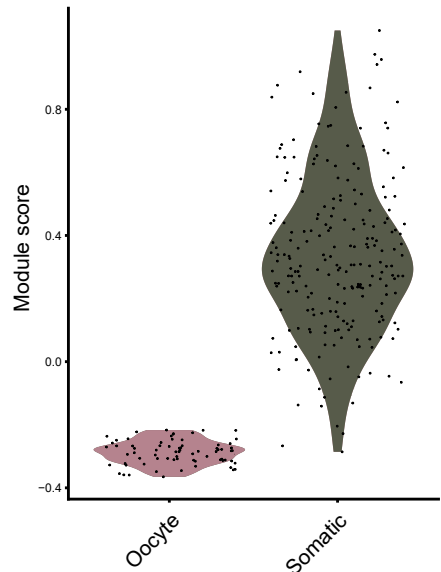

Supplement: supplementary_figure_8.pdf [file supplementary_figure_8.pdf]
