# Supplementary material for: Single-cell transcriptomics of staged oocytes and somatic cells reveal novel regulators of follicle activation
Source: PubMed Central journal article supplement (PMC9354060; doi:10.1530/rep-22-0053), 2022-06-17
Supplement: supplementary_table_1.pdf [file supplementary_table_1.pdf]

**Supplementary Table 1**

|              |                                                                                                                                             |
|--------------|---------------------------------------------------------------------------------------------------------------------------------------------|
| Oocyte       | Bmp15, Dazl, Ddx4, Dppa3, Figla, Gdf9, Lhx8, Nobox, Npm2, Oog1, Pou5f1, Sohlh1, Sox30, Sub1, Sycp3, Taf7l, Ybx2, Zar1, Zp2                  |
| Somatic cell | Aard, Aldh1a2, Amh, Amhr2, Cyp11a, Cyp19a1, Foxl2, Fshr, Fst, Gatm, Gng13, Hmgcs2, Inha, Inhba, Kitl, Krt8, Krt19, Rspo1, Star, Upk3b, Wnt6 |

**Supplementary Table 1.** List of marker genes used to create module scores for oocytes and somatic cells.
